# Supplementary material for: Tailoring the interaction between a gold nanocluster and a fluorescent dye by cluster size: creating a toolbox of range-adjustable pH sensors
Source: Royal Society of Chemistry journal article supplement (doi:10.1039/d2na00487a), 2022-01-01
Supplement: d2na00487a1.pdf [file d2na00487a1.pdf]

## Supporting Information

# Tailoring the interaction between a gold nanocluster and a fluorescent dye by cluster size: creating a toolbox of range-adjustable pH sensors

Kyunglim Pyo,<sup>a</sup> María Francisca Matus,<sup>b</sup> Sami Malola,<sup>b</sup> Eero Hulkko,<sup>a</sup> Johanna Alaranta,<sup>a</sup> Tanja Lahtinen, <sup>\*a</sup> Hannu Häkkinen, <sup>\*ab</sup> Mika Pettersson<sup>\*a</sup>

<sup>a</sup>. Department of Chemistry, Nanoscience Centre, University of Jyväskylä, P.O. Box 35, FI-40014, Finland

<sup>b</sup>. Department of Physics, Nanoscience Centre, University of Jyväskylä, P.O. Box 35, FI-40014, Finland

### Extinction coefficient measurement of Au<sub>25</sub>(*p*-MBA)<sub>18</sub> and Au<sub>250</sub>(*p*-MBA)<sub>n</sub> nanoclusters

The extinction coefficient of Au<sub>25</sub>(*p*-MBA)<sub>18</sub> and Au<sub>250</sub>(*p*-MBA)<sub>n</sub> was obtained by using the Beer-Lambert equation (1);

$$A = \epsilon \times b \times c \quad (1)$$

where **A** is the absorbance of the sample, **ε** is the extinction coefficient (M<sup>-1</sup>cm<sup>-1</sup>), **b** is the optical path length (1 cm), and **c** is the molar concentration (M). The absorbance was divided by the optical path length (b) and the molar concentration (c), as in equation (2);

$$A/(b \times c) = \epsilon \quad (2)$$

Note that we have used the composition of Au<sub>25</sub>(*p*-MBA)<sub>18</sub> and Au<sub>250</sub>(*p*-MBA)<sub>75</sub> to calculate the molar weight for each solution's molar concentration.<sup>1</sup> The samples were each prepared in a 1.5 mL 0.01 M NaOH aqueous solution. A known amount of the dried cluster was added to the solution and re-dissolved. After measuring the absorbance, the values were divided by molar concentration (c) and optical path length (b) to obtain a spectrum of extinction coefficient as a function of the wavelength.

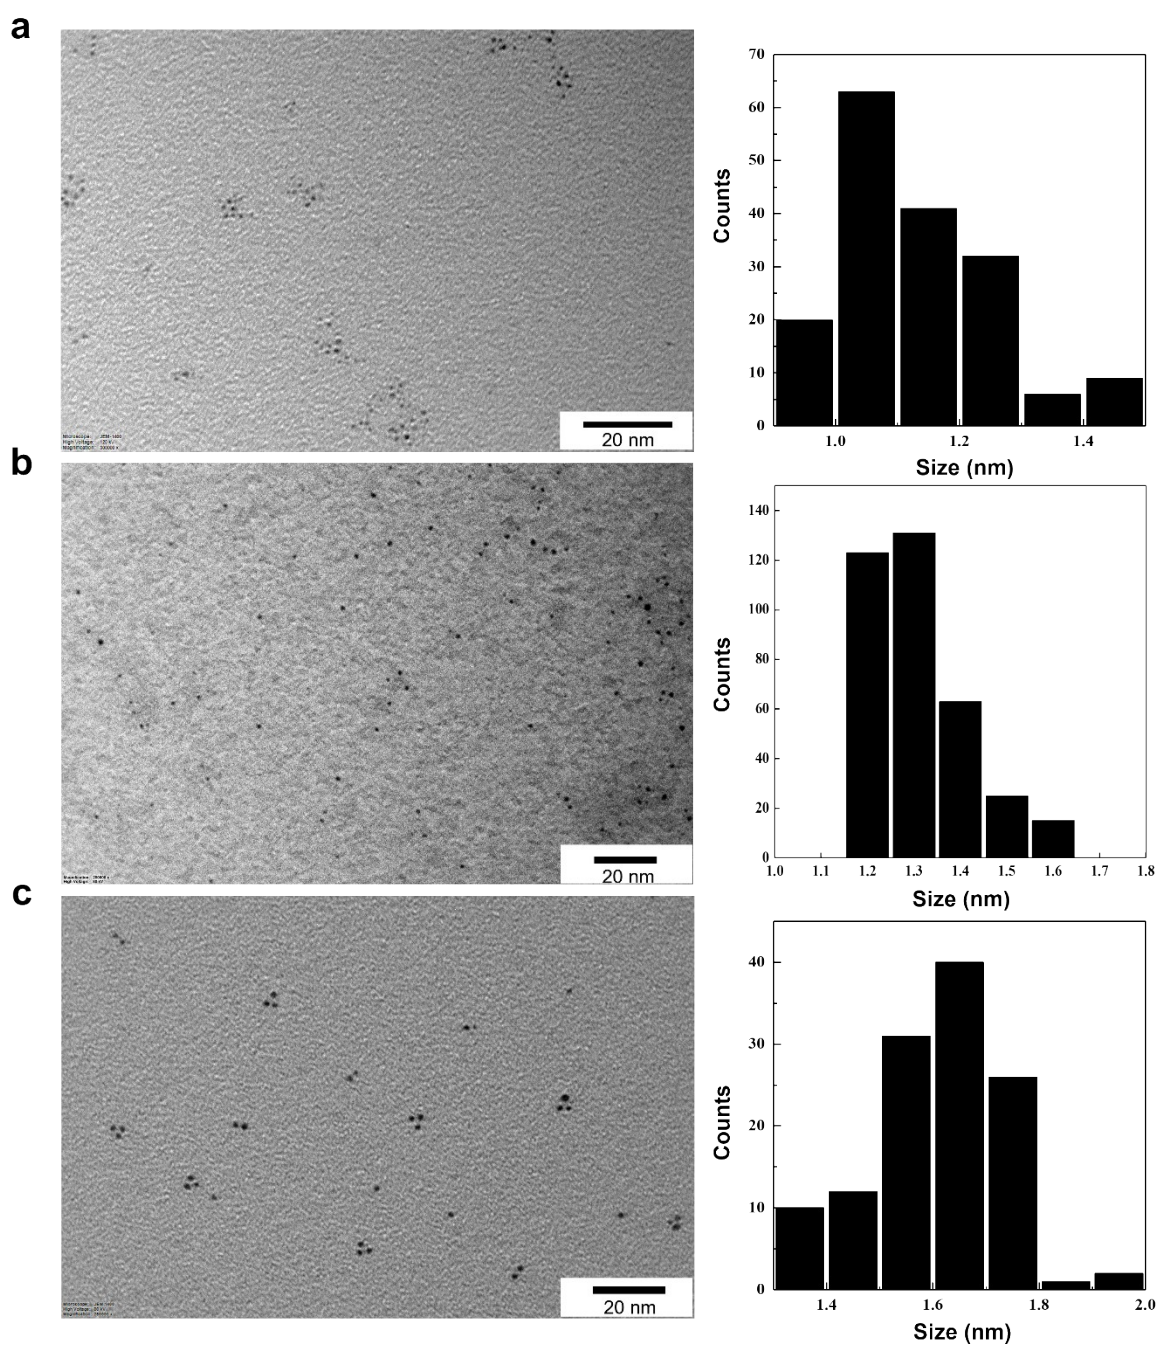

**Figure S1** TEM images of the synthesized a) Au<sub>25</sub>, b) Au<sub>102</sub>, and c) Au<sub>250</sub> nanocluster. (Scale = 20 nm) The histograms of the core size distribution is displayed on the right side of each image.

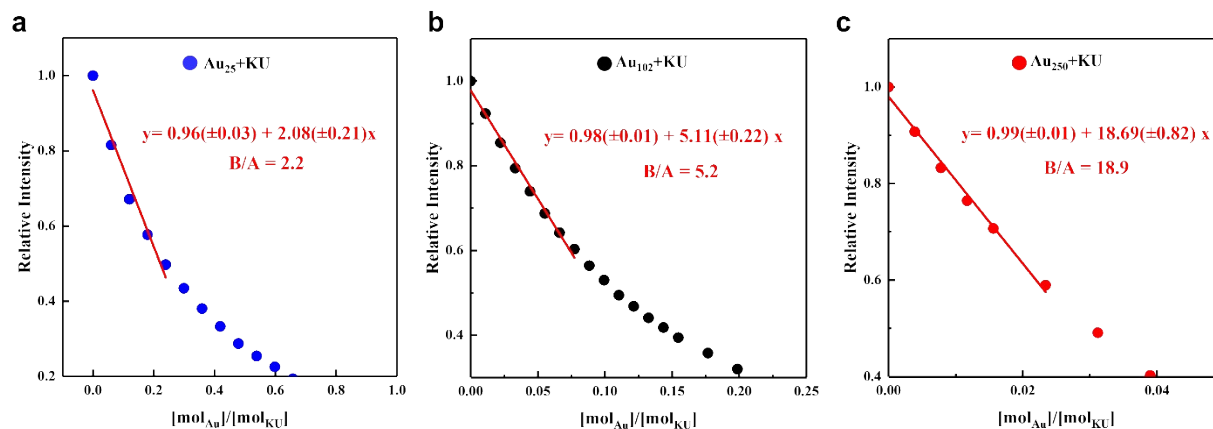

**Figure S2** The linear fit to the intensity points in the initial range ( $[\text{mol}_{\text{Au}}]/[\text{mol}_{\text{KU}}] < 0.1$ ) of the titration curve.  $y = A + Bx$  was used as a linear fit (red line), the approximate number of the bound KU with one gold nanocluster is determined by the B/A ratio. The fitting parameters and the bound KU numbers are listed in the figure.

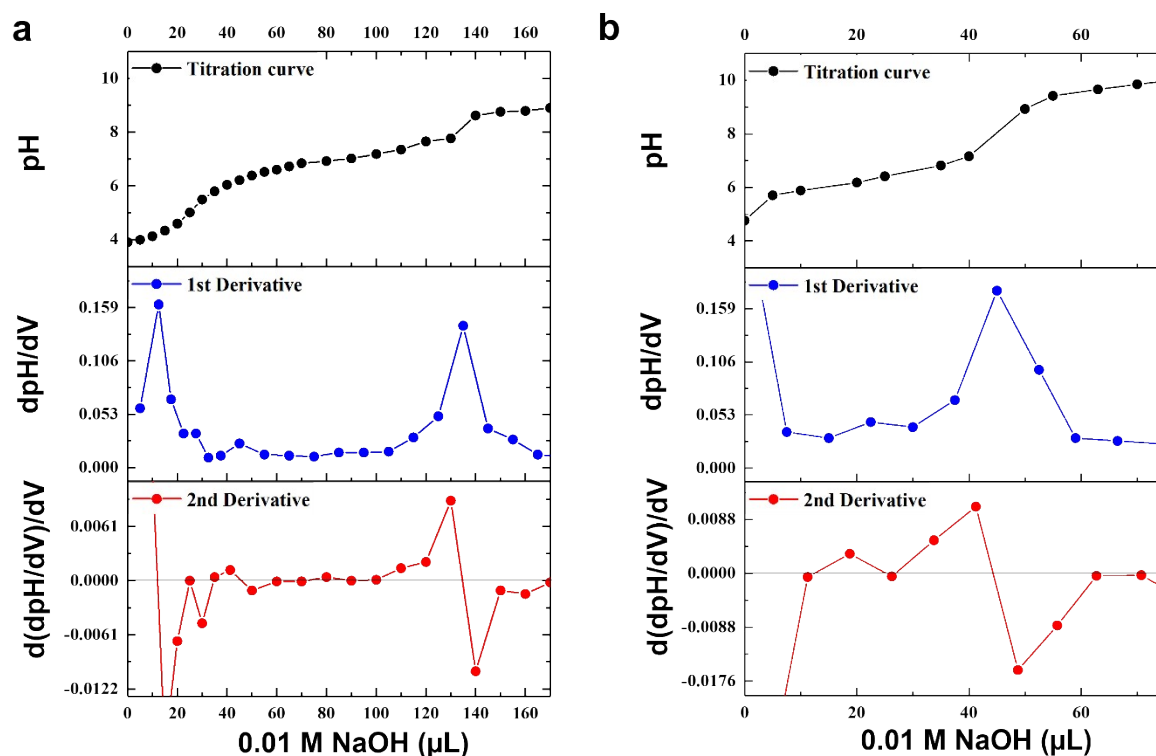

**Figure S3** Acid-base titration (Top), first derivative ( $\text{dpH}/\text{dV}$ , middle), and second derivative ( $\text{d}(\text{dpH}/\text{dV})/\text{dV}$ , bottom) curve of a)  $\text{Au}_{25}$  and b)  $\text{Au}_{250}$  nanocluster. The equivalence point and  $\text{pK}_a$  were evaluated by the second derivative value. The parameters are listed in Table S1.

|                                             | $\text{Au}_{25}\text{pMBA}_{18}$ | $\text{Au}_{250}\text{pMBA}_n$ |
|---------------------------------------------|----------------------------------|--------------------------------|
| Equivalence ( $\mu\text{L}$ )               | 134.51                           | 44.27                          |
| $\frac{1}{2}$ Equivalence ( $\mu\text{L}$ ) | 67.26                            | 22.13                          |
| pKa                                         | 6.82                             | 6.29                           |

**Table S1** Parameters from the acid-base titration curve. The equivalence point was obtained by the second derivative curve and the pKa value was determined by the half point of the equivalence point.

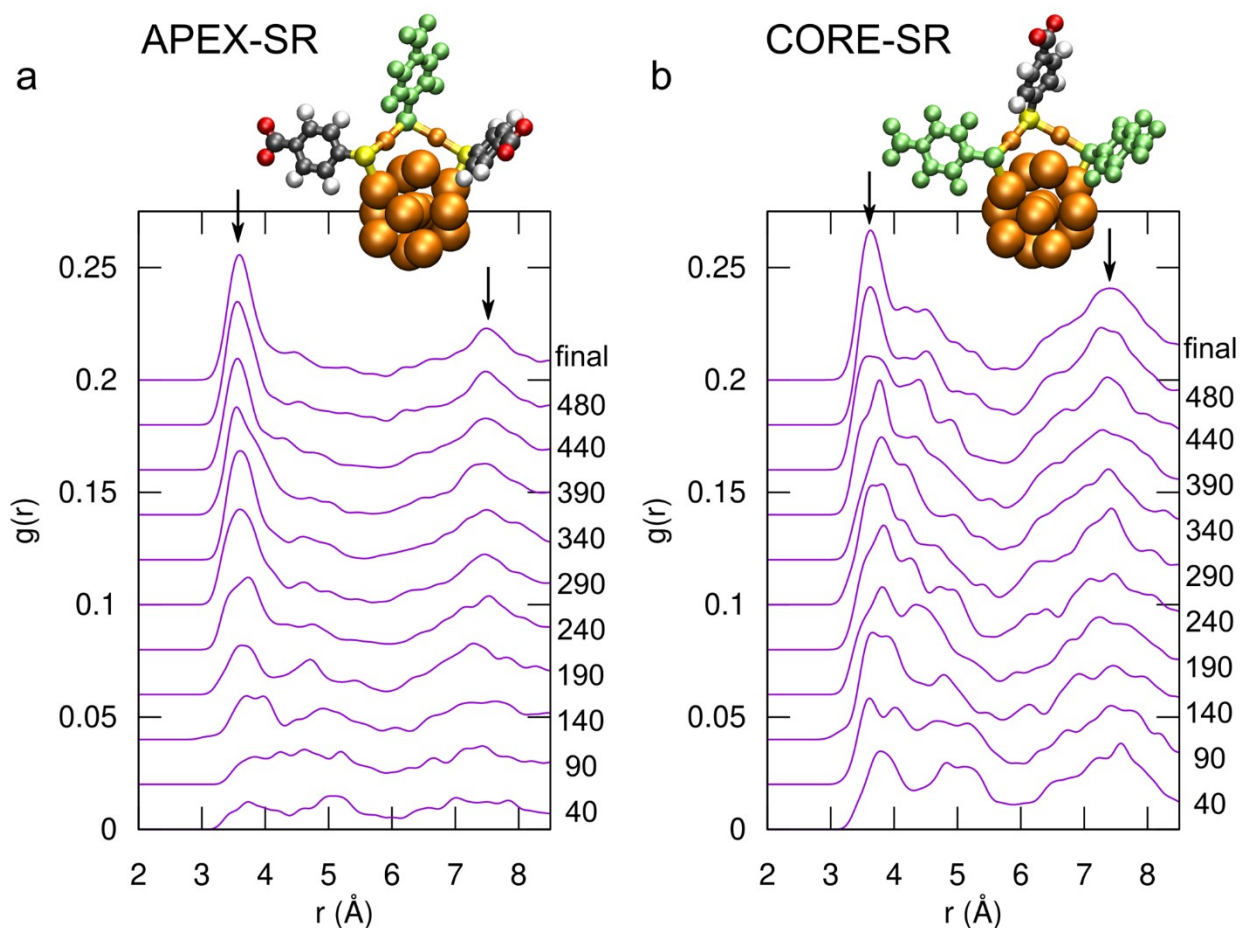

**Figure S4** Pair correlation function  $g(r)$  of phenyl rings of a) apex and b) core ligands on  $\text{Au}_{25}$ . Each curve is plotted per one ligand as a moving average over 40 snapshots frames (500 snapshots extracted from 100 ns MD-trajectory). Arrows denote the peaks that are characteristic for the nearest neighbor and second nearest neighbor distances due to  $\pi$ - $\pi$  stacking.

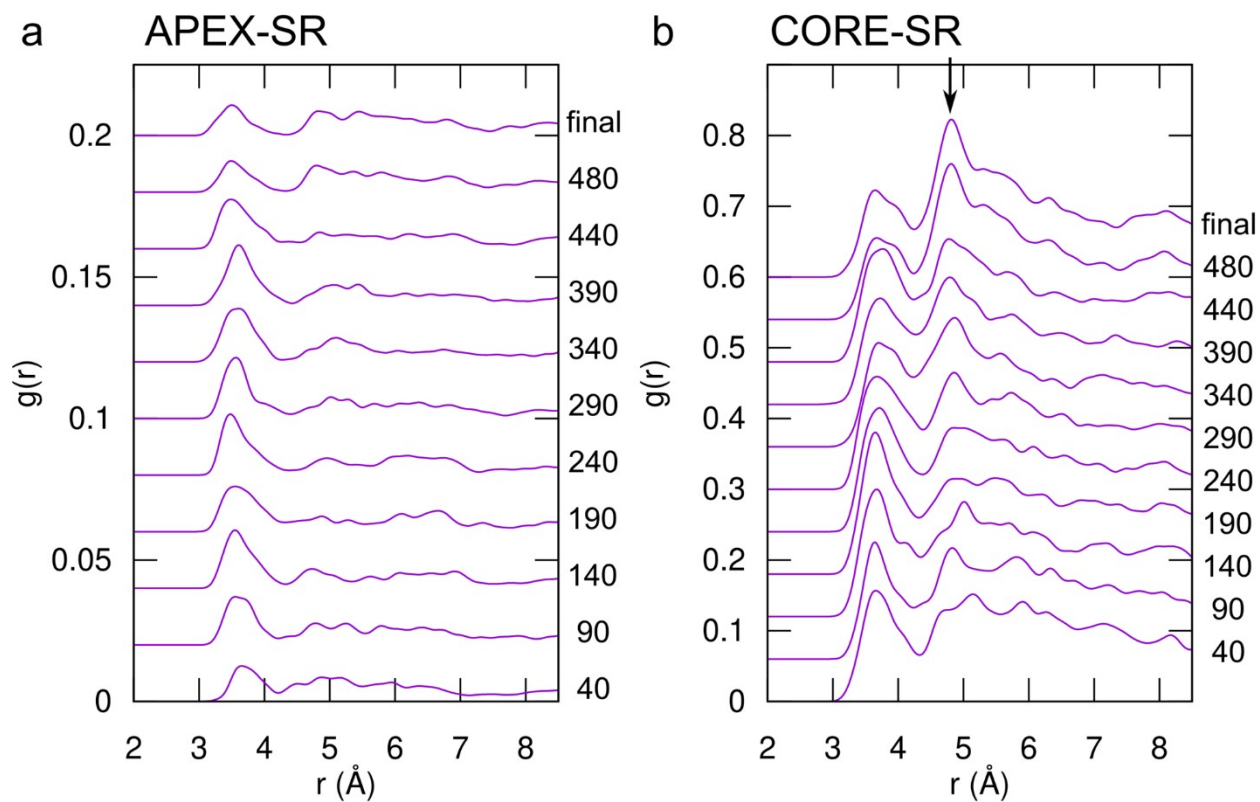

**Figure S5** The same as in Fig. S4 but for  $\text{Au}_{102}$ . Arrow denotes the peak that is characteristic for the nearest neighbor distance due to T stacked ligands.

## Reference

- 1 K. Sokołowska, *et al.*, Towards controlled synthesis of water-soluble gold nanoclusters: synthesis and analysis, *J. Phys. Chem. C*, 2019, **123**, 2602–2612
